# Supplementary material for: Can molecular dynamics simulations help in discriminating correct from erroneous protein 3D models?
Source: Springer Nature journal article supplement (doi:10.1186/1471-2105-9-6), 2008-01-07
Supplement: 12859_2007_1991_MOESM1_ESM.pdf [file 12859_2007_1991_MOESM1_ESM.pdf]

## 1 Supplementary tables

Table S1: Structural similarity between the queries and the templates according to FROST and VAST

| Class         | Model   | SCOP domain | FROST |       |      |      |      | VAST |      |      |      |      |
|---------------|---------|-------------|-------|-------|------|------|------|------|------|------|------|------|
|               |         |             | %Id   | S     | %Cov | TM   | RMSd | %Id  | S    | %Cov | TM   | RMSd |
| all- $\alpha$ | NS0     | 1tqgA       | 100   | 93.9  | 100  | 1.00 | 0.0  | 100  | 4.5  | 100  | 1.00 | 0.0  |
|               | ST1     | 1i5nA       | 32    | 75.3  | 99   | 0.87 | 1.8  | 33   | 3.6  | 95   | 0.89 | 1.4  |
|               | ST2     | 1ls1A1      | 5     | 8.9   | 83   | 0.41 | 5.9  | 4    | -0.4 | 45   | 0.62 | 2.7  |
|               | ST3     | 1jr8A       | 4     | 8.9   | 93   | 0.22 | 9.6  | 13   | -0.2 | 36   | 0.43 | 2.5  |
|               | DT1     | 1s7oA       | 10    | 7.8   | 98   | 0.07 | 17.0 | 13   | -0.7 | 29   | 0.49 | 2.1  |
|               | DT2     | 1o4tA       | -     | -     | -    | -    | -    | -    | -    | -    | -    | -    |
| all- $\beta$  | NS0     | 1o4tA       | 100   | 77.1  | 100  | 1.00 | 0.0  | 100  | 13.0 | 100  | 1.00 | 0.0  |
|               | ST1/ST2 | 1vj2A       | 18    | 16.8  | 96   | 0.71 | 3.4  | 22   | 10.0 | 77   | 0.90 | 1.4  |
|               | DT1a    | 1tzaA       | 10    | 12.9  | 88   | 0.08 | 16.0 | 4    | 0.3  | 34   | 0.35 | 3.9  |
|               | DT1b    | 1mjuL1      | 6     | 8.3   | 97   | 0.13 | 15.0 | 3    | 1.6  | 29   | 0.42 | 4.0  |
|               | DT2     | 1tqgA       | -     | -     | -    | -    | -    | -    | -    | -    | -    | -    |
| $\alpha\beta$ | NS0     | 1k77A       | 100   | 194.0 | 100  | 1.00 | 0.0  | 100  | 23.0 | 100  | 1.00 | 0.0  |
|               | ST1     | 1i60A       | 16    | 8.9   | 98   | 0.69 | 6.8  | 18   | 16.0 | 95   | 0.83 | 3.0  |
|               | ST2     | 1qtwA       | 6     | 9.8   | 96   | 0.54 | 8.0  | 12   | 13.0 | 91   | 0.79 | 3.3  |
|               | ST3     | 1qpoA1      | 9     | 9.3   | 63   | 0.29 | 11.0 | 6    | 8.0  | 49   | 0.67 | 3.5  |
|               | DT1     | 1m4oA       | 7     | 8.3   | 60   | 0.17 | 18.8 | 5    | -4.8 | 7    | 0.04 | 3.8  |
|               | DT2     | 1bkpA       | -     | -     | -    | -    | -    | -    | -    | -    | -    | -    |

*%Id*: Percentage of sequence identity; *S*: Method score; *%Cov*: percentage of the query sequence aligned with the template; *TM*: TM-score between aligned segments; *RMSd*: Root Mean Square deviation corresponding to aligned residues (in Å).

Table S2: Comparisons of the models and the query native structures

| Class         | Model | TM   | RMSd | Nres | N $\alpha$ | N $\beta$ | Ncoil |
|---------------|-------|------|------|------|------------|-----------|-------|
| all- $\alpha$ | NS0   | 0.99 | 0.5  | 105  | 90         | 0         | 15    |
|               | ST1   | 0.86 | 1.8  | 105  | 85         | 0         | 20    |
|               | ST2   | 0.42 | 5.7  | 91   | 65         | 0         | 26    |
|               | ST3   | 0.24 | 11.1 | 104  | 76         | 0         | 28    |
|               | DT1   | 0.08 | 17.0 | 105  | 78         | 0         | 27    |
|               | DT2   | 0.11 | 15.0 | 105  | 6          | 66        | 33    |
| all- $\beta$  | NS0   | 1.00 | 0.2  | 106  | 3          | 66        | 37    |
|               | ST1   | 0.83 | 2.3  | 106  | 0          | 56        | 50    |
|               | ST2   | 0.71 | 3.4  | 104  | 0          | 59        | 45    |
|               | DT1a  | 0.08 | 16.0 | 98   | 0          | 59        | 39    |
|               | DT1b  | 0.13 | 15.0 | 112  | 0          | 48        | 64    |
|               | DT2   | 0.11 | 15.3 | 106  | 86         | 0         | 20    |
| $\alpha\beta$ | NS0   | 1.00 | 0.1  | 260  | 110        | 36        | 114   |
|               | ST1   | 0.81 | 3.4  | 260  | 114        | 44        | 102   |
|               | ST2   | 0.54 | 8.0  | 260  | 107        | 29        | 124   |
|               | ST3   | 0.29 | 11.1 | 200  | 62         | 26        | 112   |
|               | DT1   | 0.17 | 18.8 | 196  | 30         | 14        | 162   |
|               | DT2   | 0.13 | 20.6 | 260  | 84         | 48        | 128   |

TM: TM-score; RMSd: Root Mean Square deviation in Å; Nres: Number of residues in the model; N $\alpha$ , N $\beta$ , Ncoil: number of residues in the corresponding secondary structures.

Table S3: Score distribution characteristics

| Score                 | mean  | std. dev. | 1% conf. | N      | Shapiro |
|-----------------------|-------|-----------|----------|--------|---------|
| $S_{prot\alpha}$      | -0.99 | 0.130     | -1.29    | 79     | 0.8     |
| $S_{w11\alpha}$       | -0.98 | 0.296     | -1.87    | 7297   | —       |
| $S_{prot\beta}$       | -0.98 | 0.113     | -1.30    | 118    | < 0.01  |
| $S_{w11\beta}$        | -0.96 | 0.293     | -1.81    | 11 779 | —       |
| $S_{prot\alpha\beta}$ | -0.98 | 0.076     | -1.15    | 167    | 0.1     |
| $S_{w11\alpha\beta}$  | -0.97 | 0.301     | -1.83    | 42 198 | —       |

$S_{prot}$  global score,  $S_{w11}$  window score, mean: average value, std. dev.: standard deviation, 1% conf: 1% confidence value, N: number of points involved in the computation, Shapiro: Shapiro-Wilk p-value, when applicable.

Table S4: Proteins used for the analysis

| class         | Nprot | Nres   | Lp min | Lp max | % seq ID |
|---------------|-------|--------|--------|--------|----------|
| all- $\alpha$ | 79    | 8 087  | 70     | 130    | 50       |
| all- $\beta$  | 118   | 12 959 | 70     | 130    | 50       |
| $\alpha\beta$ | 167   | 43 868 | 230    | 290    | 50       |

Nprot: number of proteins used in the analysis, Nres: corresponding number of residues, Lp min: minimum size (in residues) of the proteins, Lp max: maximum size of the proteins, % seq ID: maximum percentage of identity between 2 proteins.

## 2 Supplementary figures

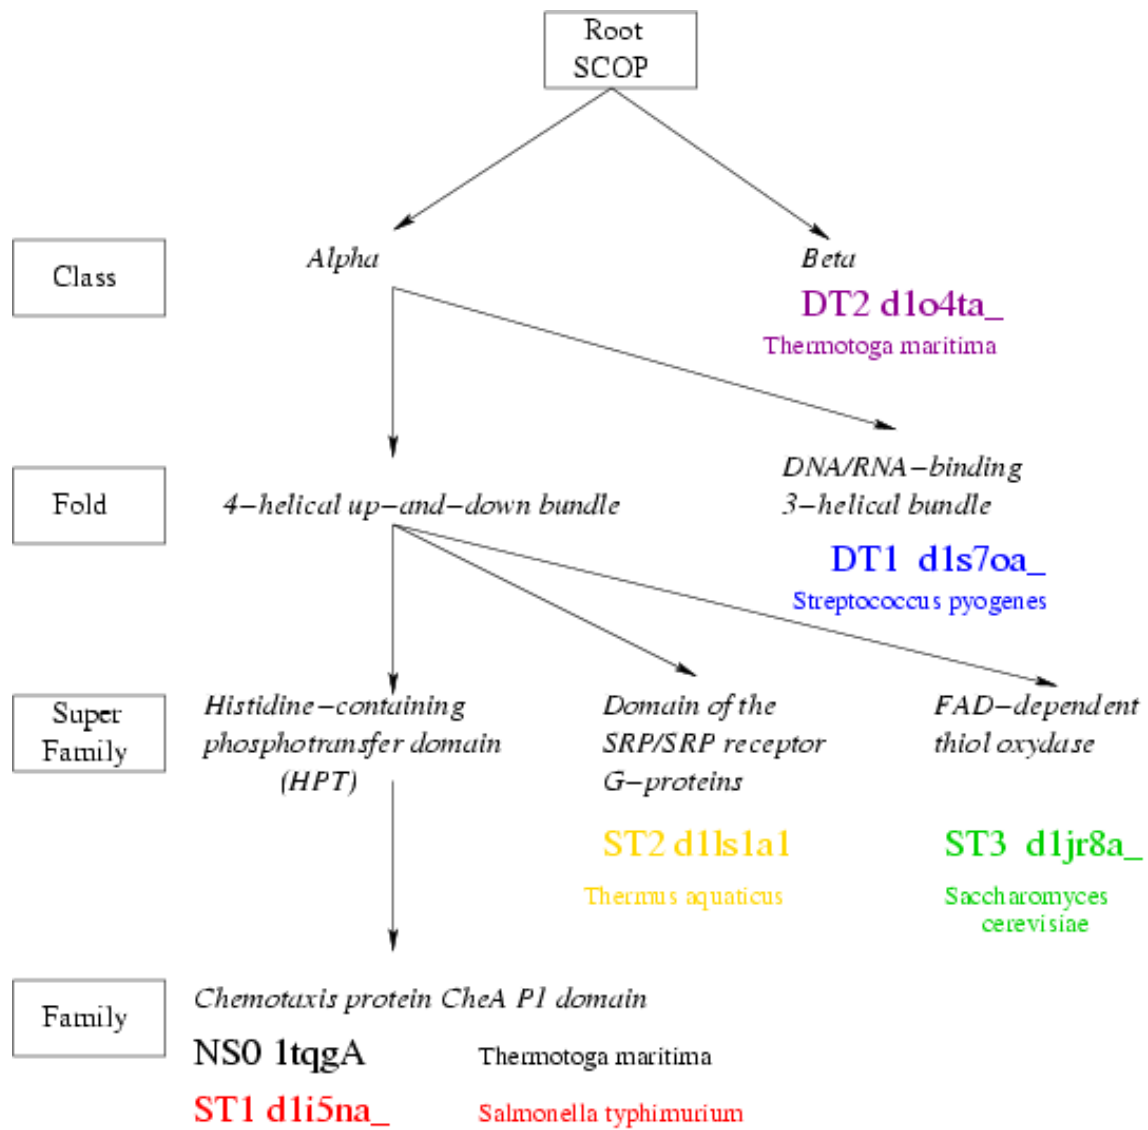

Figure S1: Relationships between the query and the template structures for the all- $\alpha$  class according to the SCOP hierarchy.

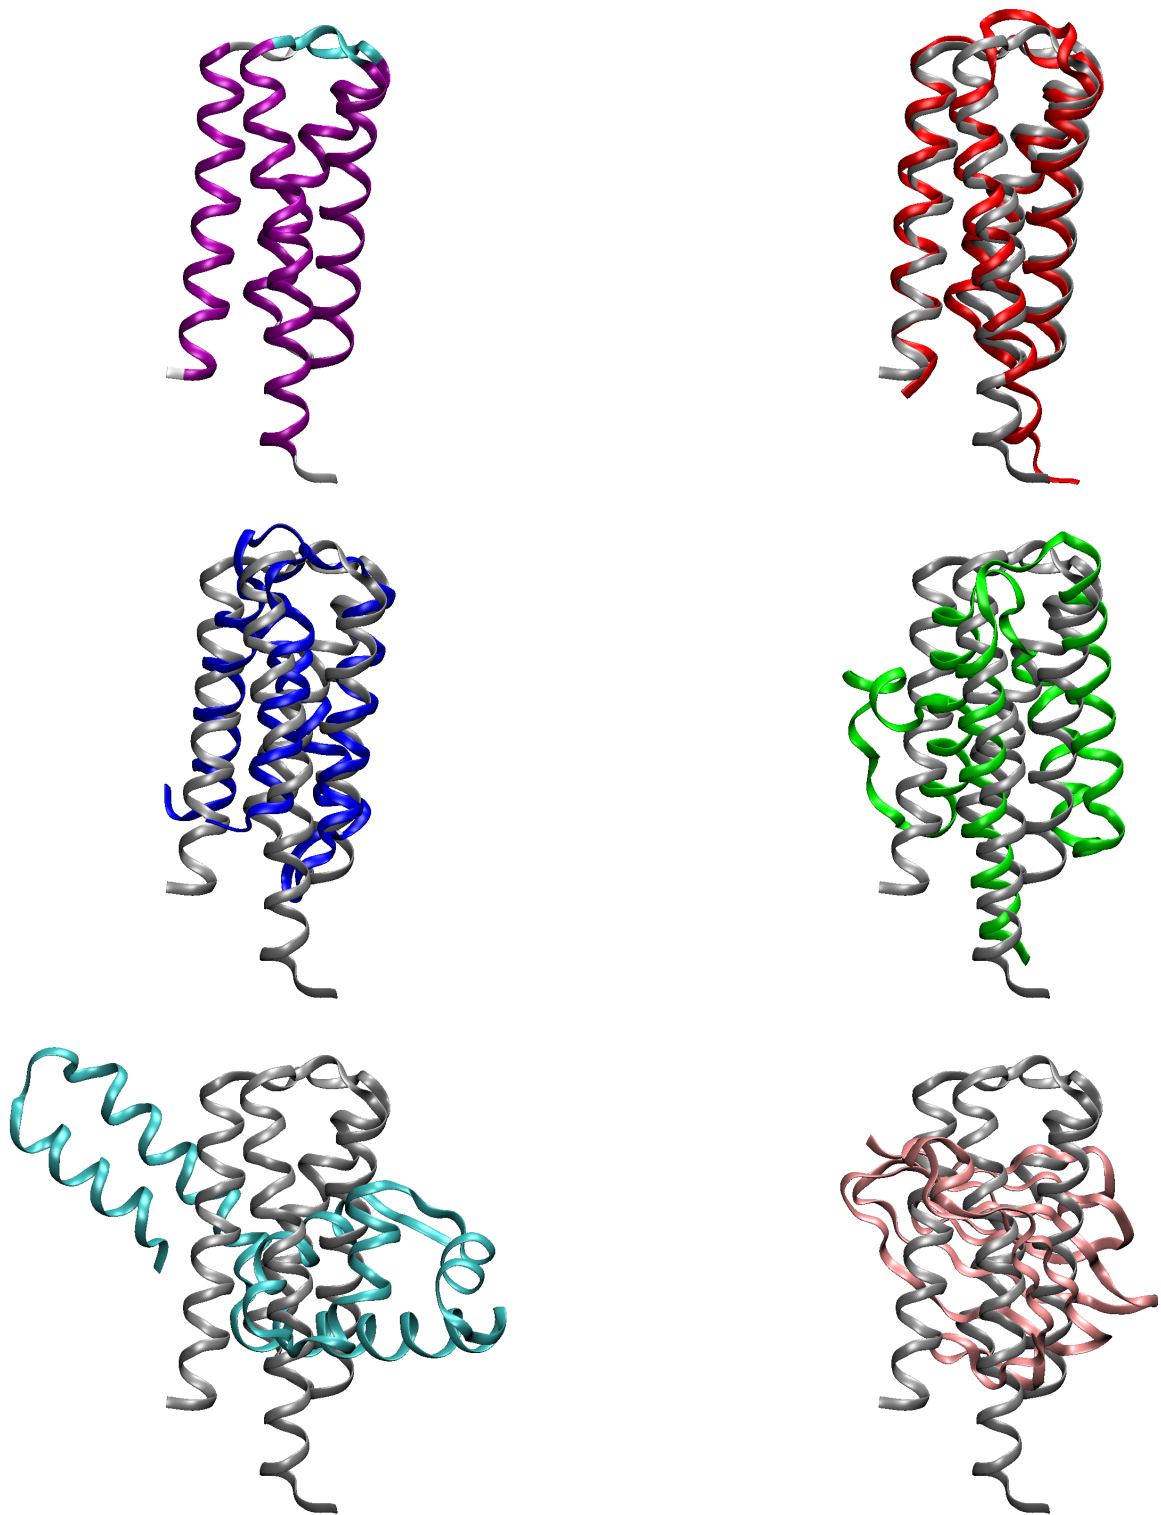

Figure S2: Superposition of the 6 models with the query native structure for the all- $\alpha$  class. From top to bottom and left to right: NS0, ST1, ST2, ST3, DT1, DT2



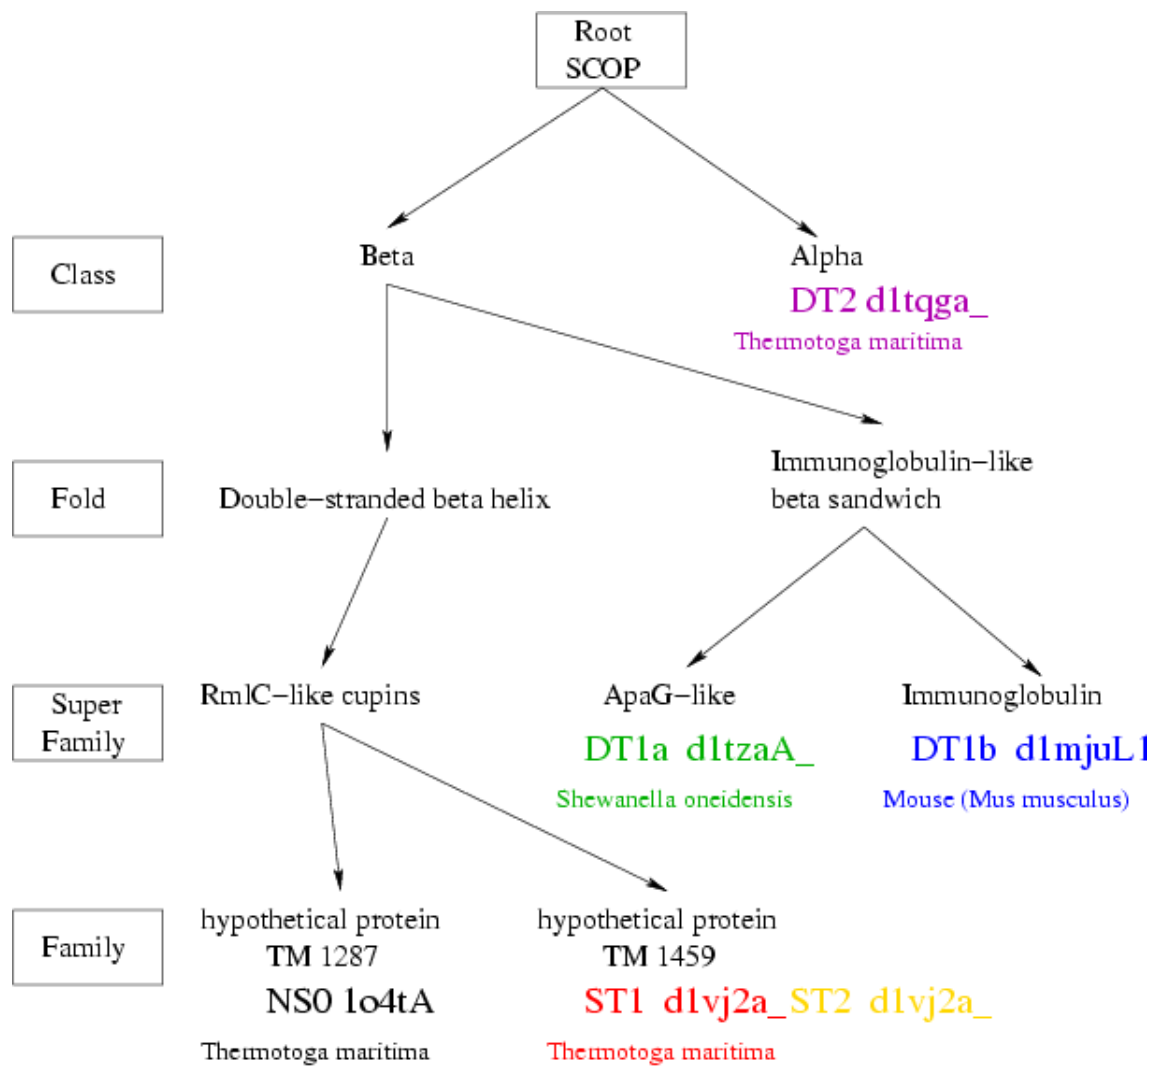

Figure S3: Relationships between the query and the template structures for the all- $\beta$  class according to the SCOP hierarchy.

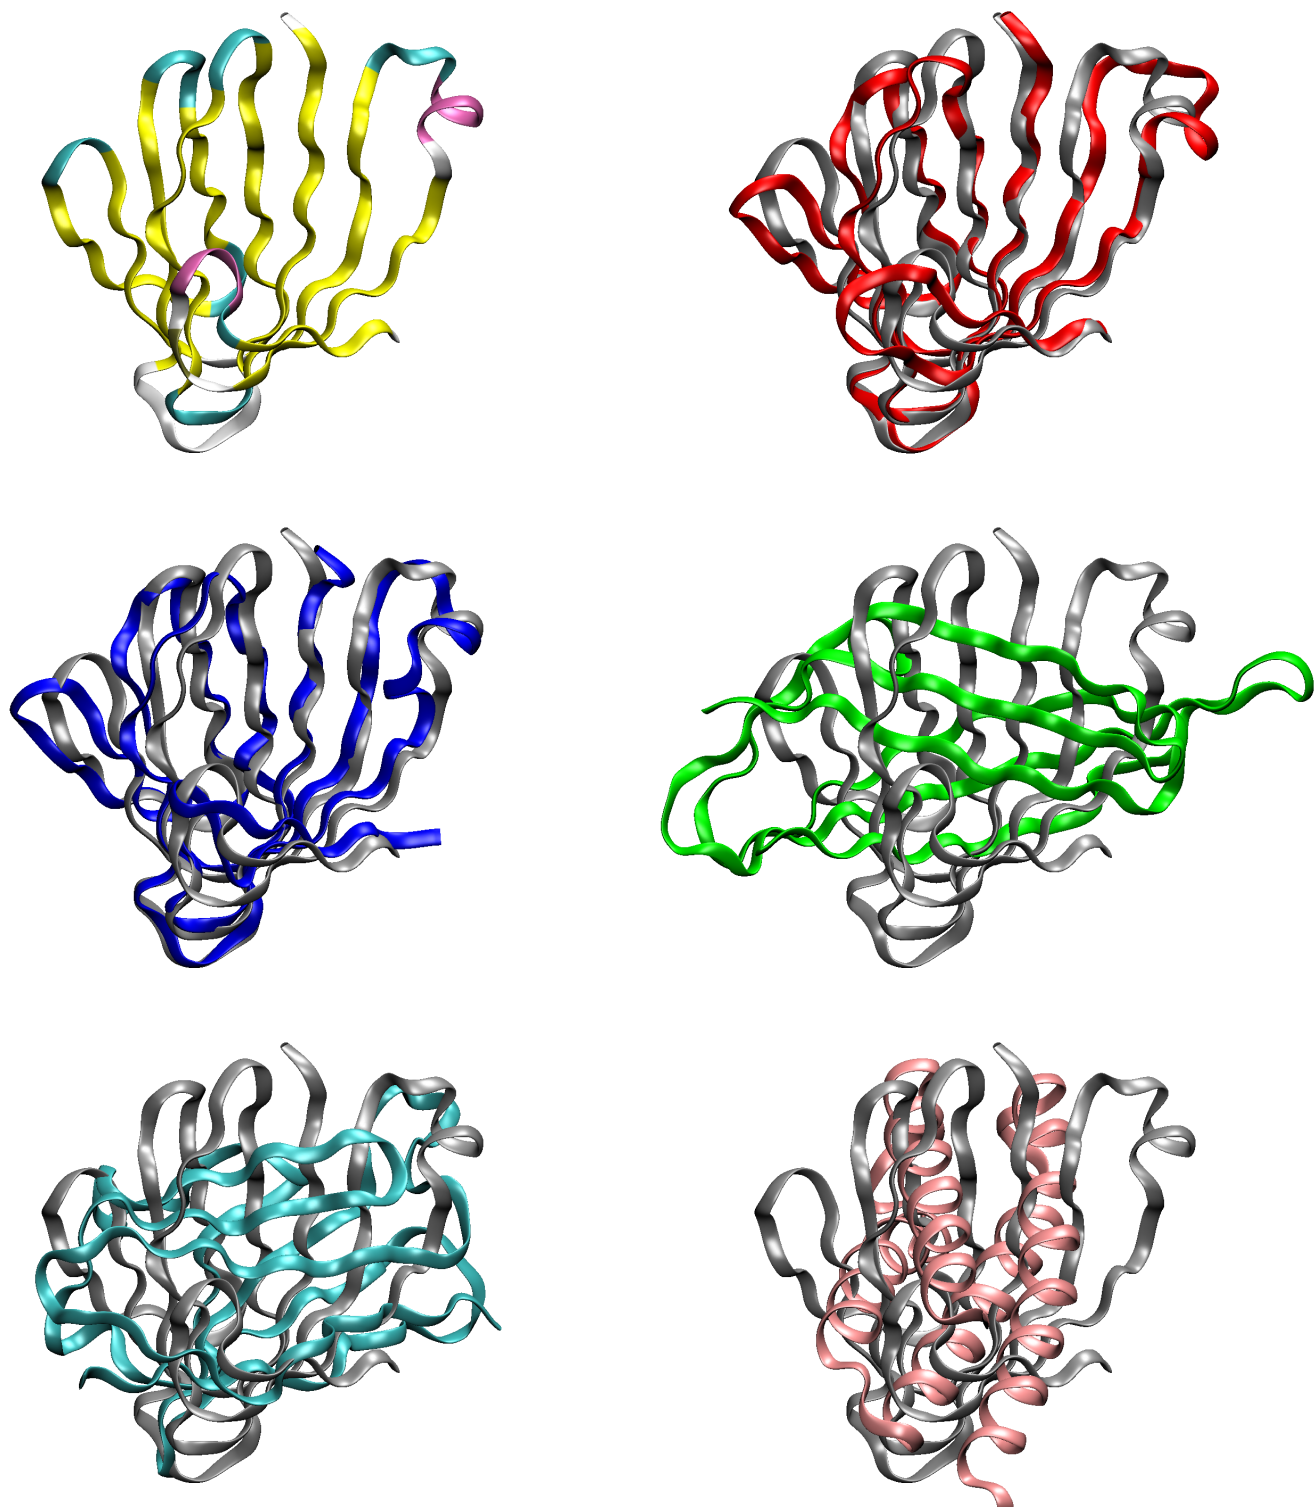

Figure S4: Superposition of the 6 models with the query native structure for the all- $\beta$  class. From top to bottom and left to right: NS0, ST1, ST2, DT1a, DT1b, DT2

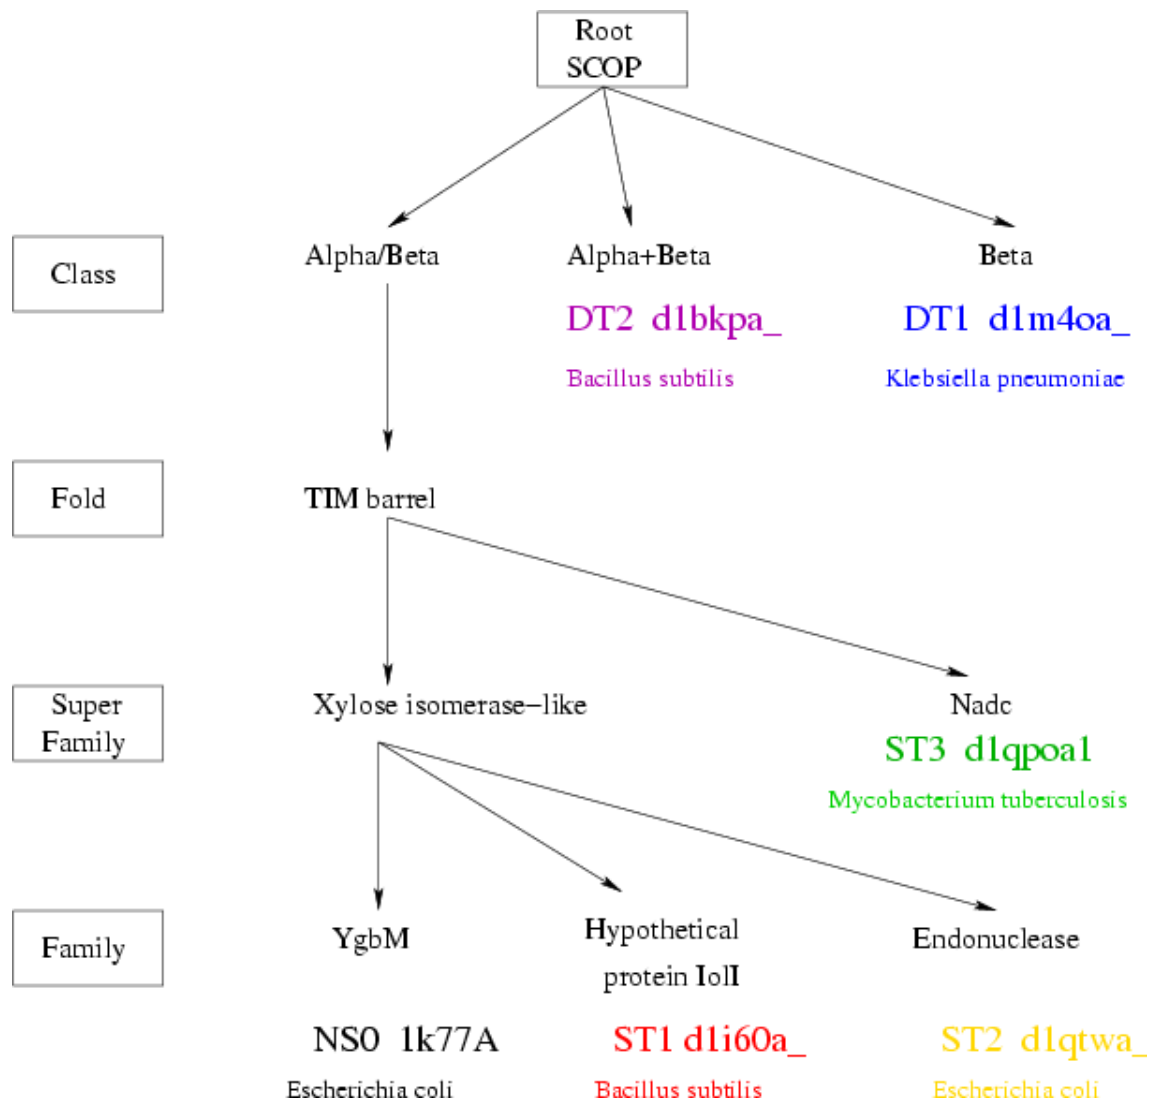

Figure S5: Relationships between the query and the template structures for the  $\alpha\beta$  class according to the SCOP hierarchy.

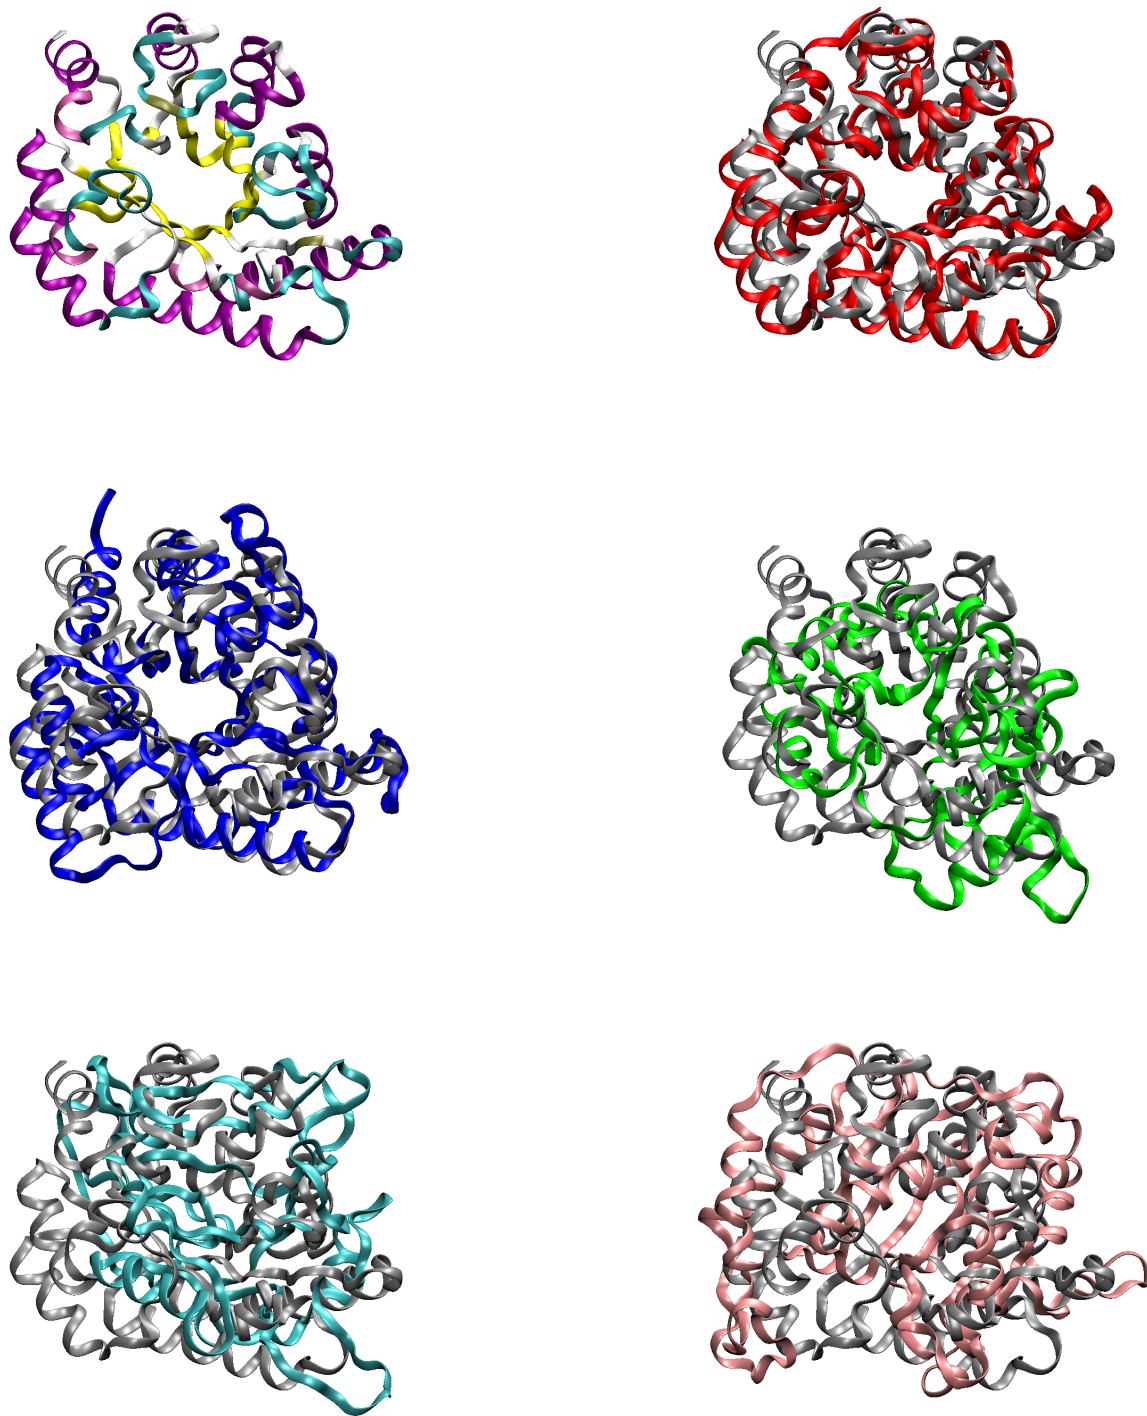

Figure S6: Superposition of the 6 models with the query native structure for the  $\alpha\beta$  class. From top to bottom and left to right: NS0, ST1, ST2, ST3, DT1, DT2

|     |       |       |       |       |       |       |
|-----|-------|-------|-------|-------|-------|-------|
| DT2 | 0     | 0     | 1e-07 | 0     | 0     | 0.271 |
| DT1 | 0     | 0     | 0     | 0     | 0.578 | 0     |
| ST3 | 0     | 0     | 0     | 0.362 | 0     | 0.033 |
| ST2 | 0     | 0     | 0.279 | 0     | 0     | 0     |
| ST1 | 0     | 0.225 | 0.21  | 0     | 0     | 0     |
| NS0 | 0.132 | 0     | 0     | 0     | 0     | 0     |
|     | NS0   | ST1   | ST2   | ST3   | DT1   | DT2   |

alpha 300K

|     |       |         |         |         |         |         |
|-----|-------|---------|---------|---------|---------|---------|
| DT2 | 0     | 0       | 0.037   | 0       | 0       | 0.266   |
| DT1 | 0     | 0       | 0       | 0       | 0.572   | 0       |
| ST3 | 0     | 0       | 0       | 0.357   | 3.4e-08 | 0.15    |
| ST2 | 0     | 0       | 0.278   | 4.1e-06 | 0       | 0.0012  |
| ST1 | 0     | 0.226   | 0.72    | 7.6e-07 | 0       | 0.00034 |
| NS0 | 0.131 | 7.9e-07 | 1.3e-07 | 0       | 0       | 0       |
|     | NS0   | ST1     | ST2     | ST3     | DT1     | DT2     |

alpha 300K N/10

|      |       |         |       |       |       |         |
|------|-------|---------|-------|-------|-------|---------|
| DT2  | 0     | 0       | 0     | 0     | 0     | 0.278   |
| DT1b | 0     | 0       | 0     | 0     | 0.291 | 0       |
| DT1a | 0     | 0       | 0     | 0.373 | 0     | 1.2e-10 |
| ST2  | 0     | 4.9e-09 | 0.234 | 0     | 0.23  | 0       |
| ST1  | 0     | 0.241   | 0.008 | 0     | 0.15  | 0       |
| NS0  | 0.188 | 0       | 0     | 0     | 0     | 0       |
|      | NS0   | ST1     | ST2   | DT1a  | DT1b  | DT2     |

beta 300K

|     |       |         |       |       |       |       |
|-----|-------|---------|-------|-------|-------|-------|
| DT2 | 0     | 0       | 0     | 0     | 0     | 0.362 |
| DT1 | 0     | 0       | 0     | 0     | 0.439 | 0     |
| ST3 | 0     | 0       | 0     | 0.346 | 0     | 0     |
| ST2 | 0     | 0       | 0.327 | 0.067 | 0     | 0     |
| ST1 | 0     | 0.26    | 0     | 0     | 0     | 0     |
| NS0 | 0.163 | 1.6e-05 | 0     | 0     | 0     | 0     |
|     | NS0   | ST1     | ST2   | ST3   | DT1   | DT2   |

alphabetalpha 300K

Figure S7: Student p-value matrices for the all- $\alpha$  class (top left), all- $\beta$  class (bottom left) and  $\alpha\beta$  class (bottom right) at 300 K. The top right matrix is similar to the top left matrix except that the number of points used for the computations is ten times less. The matrix upper triangular values show the P-values for the Student t-test on the means. The lower triangular values shows the p-values for the Student F-test on the variances. Diagonal elements show the RMSd mean values in nm. For instance the first row, third column position of the top left matrix whose value is  $1 \cdot 10^{-7}$  is the probability that the distributions of RMSd for the DT2 and ST2 models have the same mean. This p-value is sufficiently small to reject this hypothesis and to consider that the two distributions have significantly different means.

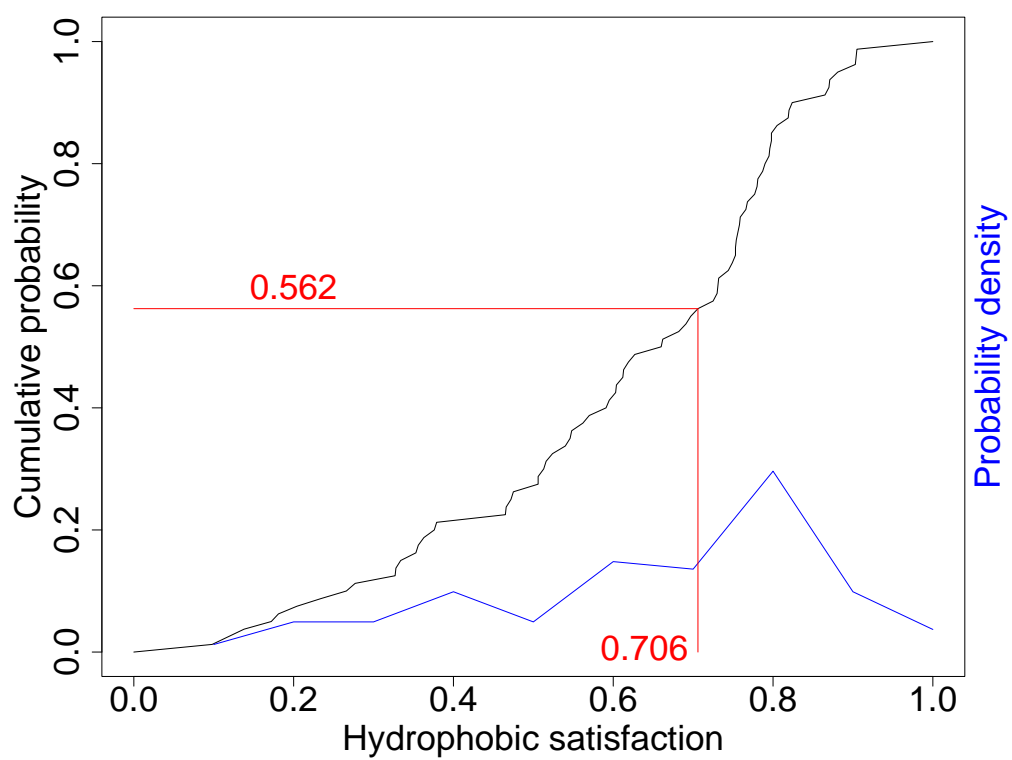

Figure S8: Density probability (blue line) and cumulative probability (black line) of the tryptophan hydrophobic satisfaction calculated with 79 all- $\alpha$  class protein 3D structures.
