# Supplementary material for: Can molecular dynamics simulations help in discriminating correct from erroneous protein 3D models?
Source: Springer Nature journal article supplement (doi:10.1186/1471-2105-9-6), 2008-01-07

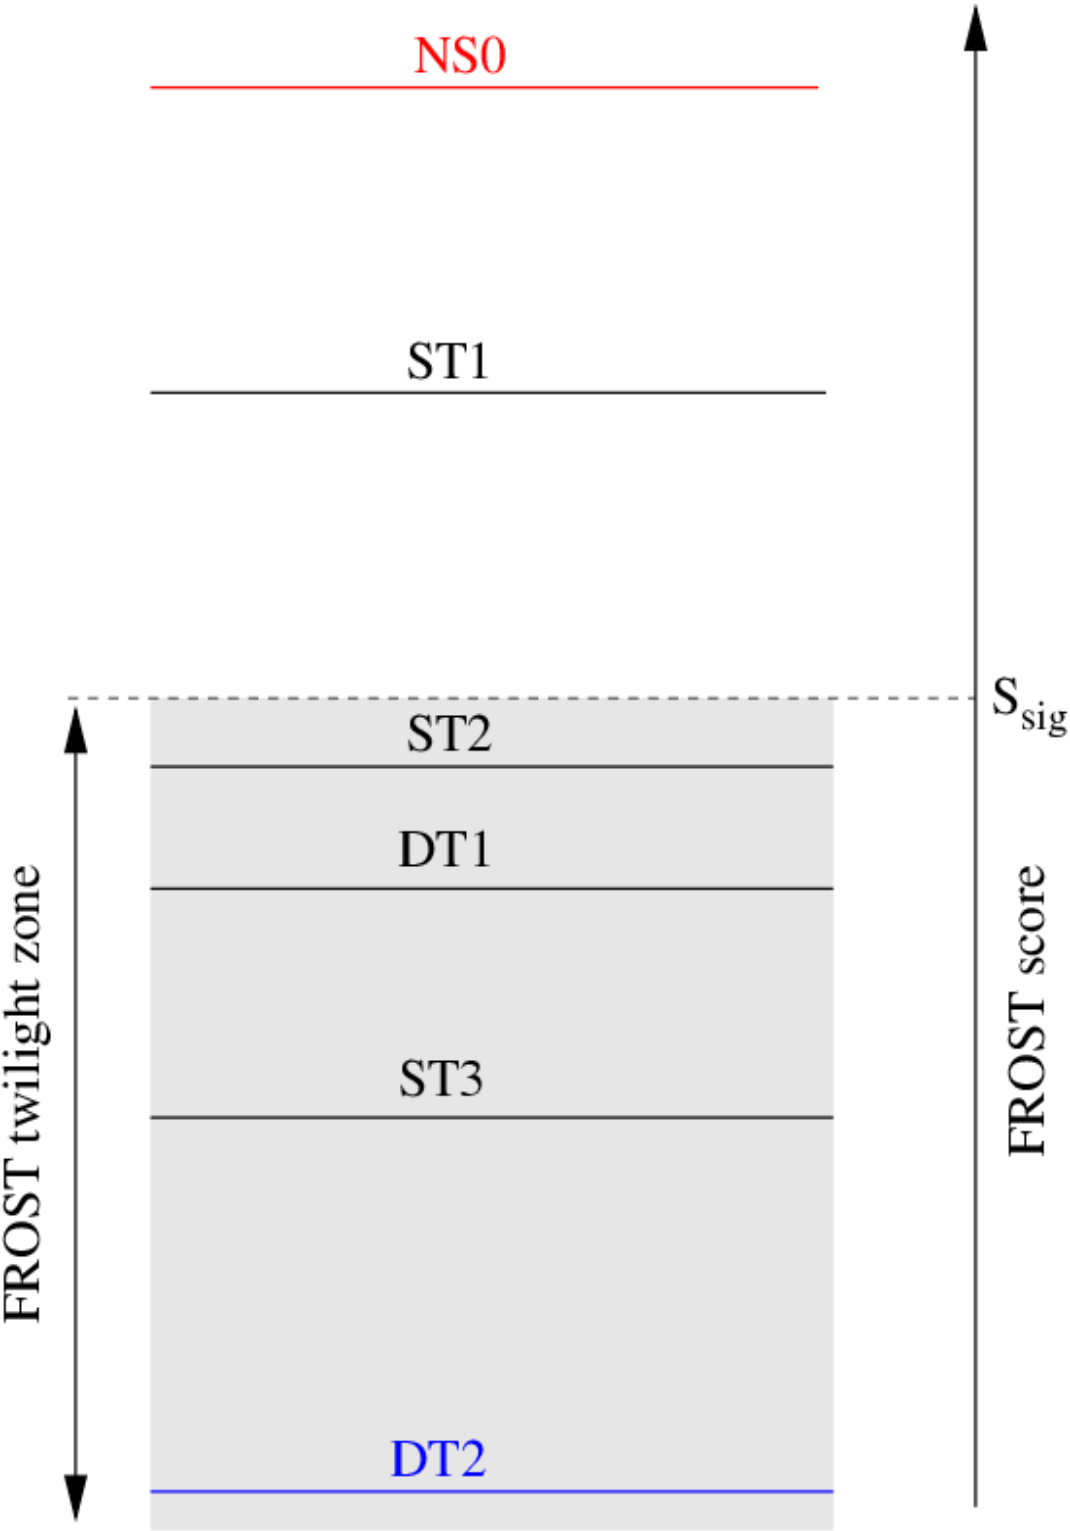

Supplement: 12859_2007_1991_MOESM2_ESM.pdf [file 12859_2007_1991_MOESM2_ESM.pdf]
