# Supplementary material for: Can molecular dynamics simulations help in discriminating correct from erroneous protein 3D models?
Source: Springer Nature journal article supplement (doi:10.1186/1471-2105-9-6), 2008-01-07
Supplement: 12859_2007_1991_MOESM3_ESM.pdf [file 12859_2007_1991_MOESM3_ESM.pdf]

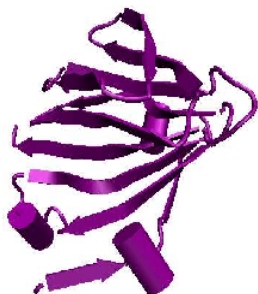

**DT2: 1o4tA**  
FROST: ---  
VAST: ---  
TM: ---  
RMSd: 15.0

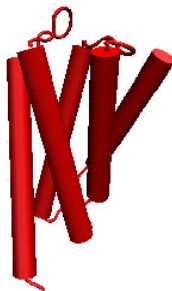

**ST1: 1i5nA**  
FROST: 75.3  
VAST: 3.6  
TM: 0.89  
RMSd: 1.8

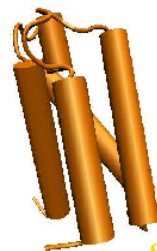

**ST2: 1ls1A1**  
FROST: 8.9  
VAST: -0.4  
TM: 0.62  
RMSd: 5.7

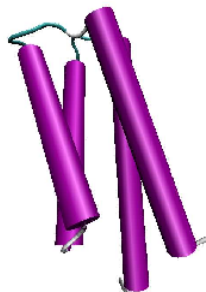

**NS0: 1tqgA**

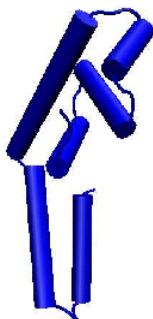

**DT1: 1s7oA**  
FROST: 7.8  
VAST: -0.7  
TM: 0.49  
RMSd: 17.0

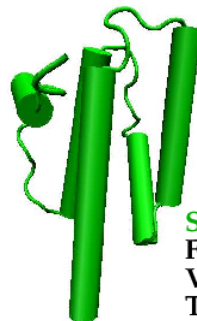

**ST3: 1rj8A**  
FROST: 8.9  
VAST: -0.2  
TM: 0.43  
RMSd: 11.1
