# Supplementary material for: Can molecular dynamics simulations help in discriminating correct from erroneous protein 3D models?
Source: Springer Nature journal article supplement (doi:10.1186/1471-2105-9-6), 2008-01-07
Supplement: 12859_2007_1991_MOESM4_ESM.pdf [file 12859_2007_1991_MOESM4_ESM.pdf]

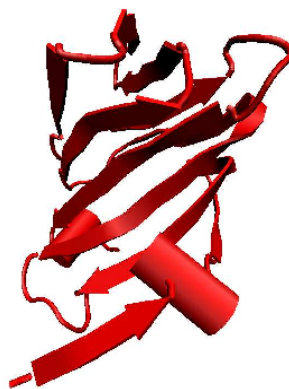

**ST1: 1vj2A**  
FROST: 16.8  
VAST: 10.0  
TM: 0.90  
RMSd: 2.3

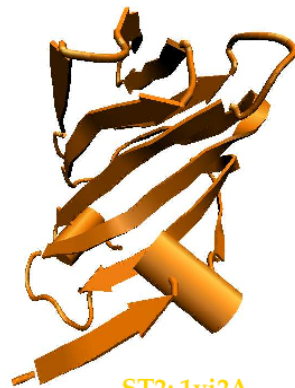

**ST2: 1vj2A**  
FROST: 16.8  
VAST: 10.0  
TM: 0.90  
RMSd: 4.3

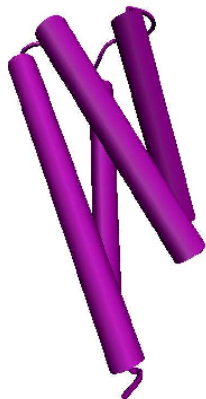

**DT2: 1tqgA**  
FROST: ---  
VAST: ---  
TM: ---  
RMSd: 15.3

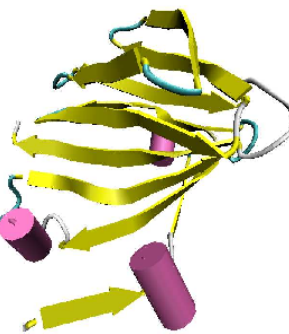

**NS0: 1o4tA**

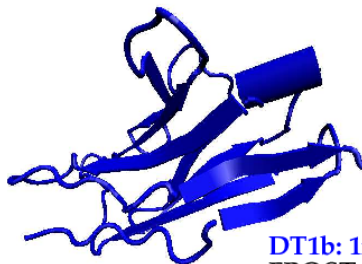

**DT1b: 1mjuL1**  
FROST: 8.3  
VAST: 1.6  
TM: 0.42  
RMSd: 15.0

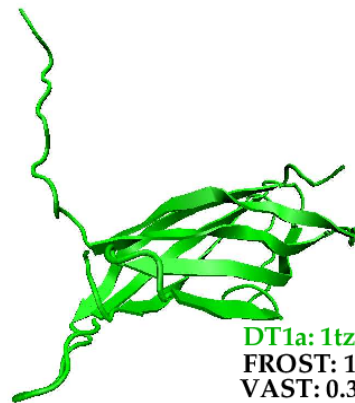

**DT1a: 1tzaA**  
FROST: 12.9  
VAST: 0.3  
TM: 0.35  
RMSd: 16.0
