# Supplementary material for: Can molecular dynamics simulations help in discriminating correct from erroneous protein 3D models?
Source: Springer Nature journal article supplement (doi:10.1186/1471-2105-9-6), 2008-01-07
Supplement: 12859_2007_1991_MOESM5_ESM.pdf [file 12859_2007_1991_MOESM5_ESM.pdf]

**DT2: 1bkpA**

FROST: ---  
VAST: ---  
TM: ---  
RMSd: 20.6

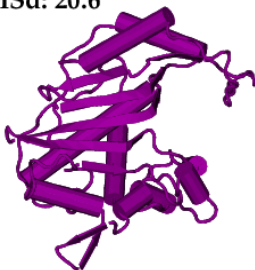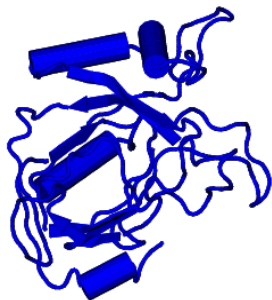

**DT1: 1m4oA**

FROST: 8.3  
VAST: -4.8  
TM: 0.04  
RMSd: 18.8

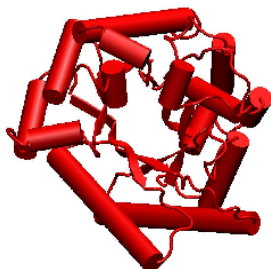

**ST1: 1i60A**

FROST: 8.9  
VAST: 16.0  
TM: 0.83  
RMSd: 3.4

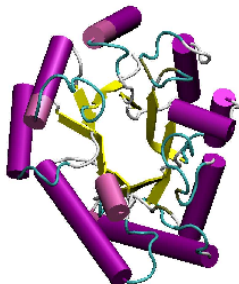

**NS0: 1k77A**

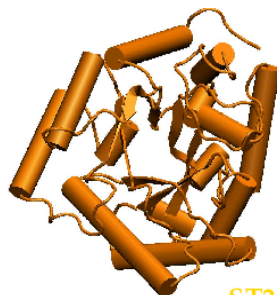

**ST2: 1qtwA**

FROST: 9.8  
VAST: 13.0  
TM: 0.79  
RMSd: 8.0

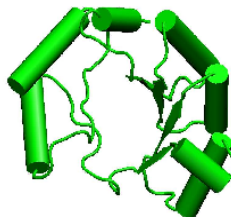

**ST3: 1qpoA1**

FROST: 9.3  
VAST: 8.0  
TM: 0.67  
RMSd: 11.1
